# Supplementary material
Source: ML conference proceedings conference paper supplement (https://openaccess.thecvf.com/content/ICCV_2019/html/Innamorati_Neural_Re-Simulation_for_ICCV_2019_paper.html)
Supplement: Supplementary file 1 [file architectures.pdf › 5023-supp/architectures.pdf]

---

## Trajectory update network

| <b>Generator Network A</b> | Input: z, Input Trajectory |
|----------------------------|----------------------------|
| Layers                     | Output shape<br>Activation |
| Dense Layer                | 1 x 1 x 256<br>ReLU        |
| Dense Layer                | 1 x 1 x 512<br>ReLU        |
| Dense Layer                | 1 x 1 x 512<br>ReLU        |
| Dense Layer                | 1 x 1 x 1024<br>ReLU       |
| Output: Gen. A             |                            |

| <b>Generator Network B</b> | Input: Input Image Features |
|----------------------------|-----------------------------|
| Layers                     | Output shape<br>Activation  |
| Dense Layer                | 1 x 1 x 1024<br>ReLU        |
| Output: Gen. B             |                             |

| <b>Generator Network C</b> | Input: Gen. A, Gen. B      |
|----------------------------|----------------------------|
| Layers                     | Output shape<br>Activation |
| Dense Layer                | 1 x 1 x 1024<br>ReLU       |
| Dense Layer                | 1 x 1 x 1024<br>ReLU       |
| Dense Layer                | 1 x 1 x 512<br>ReLU        |
| Dense Layer                | 1 x 1 x 512<br>ReLU        |
| Dense Layer                | 1 x 1 x 512<br>ReLU        |
| Dense Layer                | 1 x 1 x 256<br>ReLU        |
| Dense Layer                | 1 x 1 x 90<br>ReLU         |
| Output: Gen. C             |                            |

| <b>Discriminator Network A</b> | Input: Input Trajectory, Gen. C |
|--------------------------------|---------------------------------|
| Layers                         | Output shape<br>Activation      |
| Dense Layer                    | 1 x 1 x 256<br>ReLU             |
| Dense Layer                    | 1 x 1 x 512<br>ReLU             |
| Dense Layer                    | 1 x 1 x 1024<br>ReLU            |
| Output: Disc. A                |                                 |

---

---

| <b>Discriminator Network B</b> |              | Input: Disc. A, Gen. B |
|--------------------------------|--------------|------------------------|
| Layers                         | Output shape | Activation             |
| Dense Layer                    | 1 x 1 x 1024 | ReLU                   |
| Dense Layer                    | 1 x 1 x 512  | ReLU                   |
| Dense Layer                    | 1 x 1 x 256  | ReLU                   |
| Dense Layer                    | 1 x 1 x 1    | ReLU                   |
|                                |              | Output: Disc. B        |

---

## Depth Correction Network

| <b>Network A</b> |              | Input: Input Trajectory |
|------------------|--------------|-------------------------|
| Layers           | Output shape | Activation              |
| Dense Layer      | 1 x 1 x 256  | ReLU                    |
| Dense Layer      | 1 x 1 x 512  | ReLU                    |
| Dense Layer      | 1 x 1 x 512  | ReLU                    |
| Dense Layer      | 1 x 1 x 512  | ReLU                    |
| Dense Layer      | 1 x 1 x 1024 | ReLU                    |
|                  |              | Output: Net. A          |

---

| <b>Network B</b> |              | Input: Input Image Features, Input Depth Features |
|------------------|--------------|---------------------------------------------------|
| Layers           | Output shape | Activation                                        |
| Dense Layer      | 1 x 1 x 2048 | ReLU                                              |
|                  |              | Output: Net. B                                    |

---

| <b>Network C</b> |              | Input: Net. A, Net. B |
|------------------|--------------|-----------------------|
| Layers           | Output shape | Activation            |
| Dense Layer      | 1 x 1 x 2048 | ReLU                  |
| Dense Layer      | 1 x 1 x 1024 | ReLU                  |
| Dense Layer      | 1 x 1 x 512  | ReLU                  |
| Dense Layer      | 1 x 1 x 512  | ReLU                  |
| Dense Layer      | 1 x 1 x 256  | ReLU                  |
| Dense Layer      | 1 x 1 x 2    | ReLU                  |
|                  |              | Output: Net. C        |

---
